# Supplementary material for: Mining Industry of the Republic of Sakha (Yakutia) and Problems of Environmental and Social Security of Indigenous Peoples
Source: MDPI journal article supplement (doi:10.3390/land11010105), 2022-01-09
Supplement: s1 [file s1]

## Supplementary material

### Methodological approaches to the integral assessment of the ecological state of the environment

|                                                                                                |    |
|------------------------------------------------------------------------------------------------|----|
| 1. Methodology for a comprehensive assessment of the state of the environment                  | 1  |
| 2. Examples of calculating the assessment of the state of the environment with the use of SRI. | 4  |
| 2.1. Population. Settlements                                                                   | 4  |
| 2.2. Economic load                                                                             | 5  |
| 2.3. Technogenic violations of the natural environment                                         | 7  |
| 2.4. Health status of the population                                                           | 8  |
| 3.1. Assessment of the stability of natural complexes to man-made impacts                      | 11 |
| 3.2. Lithogenic factors                                                                        | 13 |
| 3.3. Comprehensive environmental and economic assessment state of the environment              | 17 |
| References                                                                                     | 20 |

#### 1. Methodology for a comprehensive assessment of the state of the environment

For a comprehensive assessment of the state of the environment from dissimilar indicators in 1990-2000, mainly point assessment was used, which is not devoid of some subjectivity. In the 2000s, for an integral assessment of the ecological state of the environment, using the example of the Republic of Sakha (Yakutia), we proposed a methodological approach using a quantitative indicator: the social risk index (SRI) (Burtseva, 2005, 2006). The analysis of the integral assessment of the state of the environment in the republic was carried out in three blocks. **Block A.** Anthropogenic load: a) population (2 indicators), b) mining industry (2 indicators), c) forestry (1 indicator), d) agriculture (3 indicators), e) transport (5 indicators). **Block B** Environmental and social consequences: a) air pollution (1 indicator), surface water pollution (1 indicator), disturbance of the earth's surface (1 indicator), medical and demographic situation: birth rate per 1000 people. population (1 indicator), total mortality per 1000 people. population (1 indicator), infant mortality per 1000 people. population (1 indicator), total morbidity per 1000 people. population (1 indicator), primary access to disability per 10,000 people. population (1 indicator), malignant tumors and neoplasms per 100,000 people. population (1 indicator). **Block C** Stability of natural complexes: climatic factors (3 indicators), biotic factors (3 indicators), lithogenic factors (2 indicators). In total, the processing included 30 indicators in three blocks. The main problem of the integrated assessment of dissimilar factors is to bring indicators with different units of measurement into a single, quantitatively comparable system. For these purposes, we consider it quite acceptable to use not unnecessarily complicated indices for assessing the state of an object for each block or simple points obtained in an expert order, but a simpler, reliable and universal quantitative indicator

widely used in practice - the percentage of a feature in the estimated system of parameters. This is the social risk factor (SRI), which is a deviation from the average state of an object in relative terms and which is sufficiently free from the elements of subjectivity characteristic of simple points. The ranking procedure can be divided into two stages. At the first stage, all indicators of the estimated factors for each block are brought into comparable ones by converting absolute values into relative ones. For this, the SRI is determined, which is calculated as the share of the characteristic in the average republican indicator. For the convenience of calculations, a better perception of the results and the release of the index from the dimension, instead of one hundred percent, one is accepted. Moreover, all indicators of the assessed factors and the indices calculated for them are presented by their average values. SRI is determined by the formula:

$$SRI_i = \frac{a_i}{M}$$

where  $a_i$  is the absolute value of the  $i$ -th indicator, and  $M$  is the absolute average value of a set of indicators.

Then the objects are ordered (ranked) according to the increase in factor strength (average SRI). The second stage of the ranking technique consists in dividing a continuous series into discrete classes (groups), that is, building a rating scale. We have identified five groups and each group has been assigned a certain range of values of the factor intensity with their uniform increase from rank to rank. The choice of the ranking axis is the most crucial moment of the study, since it is not devoid of certain subjectivity. To obtain more objective results of assessing the factor under study, it is necessary to choose the most informative (indicator) from the set of its features (indicators).

A comprehensive ecological and economic assessment of the state of the regions was carried out in three blocks: anthropogenic load, ecological and social consequences, resistance of permafrost landscapes to anthropogenic influences. Research consists of two stages. The first stage is analytical, where a comparative analysis of the object is carried out according to the three above-mentioned blocks. To determine the intensity of anthropogenic loads, indicators were adopted that characterize a certain type of nature management and population settlement. All indicators of the economic burden are combined into three large groups: industry, transport, agriculture; the population load is taken as its density and the number of settlements. Socio-ecological consequences are combined into two large groups: disturbance of the natural environment, morbidity of the population. The resistance of permafrost landscapes to anthropogenic impacts was assessed by climatic, biotic and lithogenic factors (Table 1). The second stage of a comprehensive assessment of the state of the environment is synthetic, which is a generalized assessment of the ecological state in administrative regions and includes the procedure for bringing the obtained assessment indicators for three blocks into one system. As a result of these works, each administrative region receives a certain ecological and economic status according to the state of the environment, i.e. a specific place in a generalized ranked series.

**Table 1.** Structure of indicators for a comprehensive assessment of the state.

| Groups of Factors Determining the State of the ES | Assessment Objects                 | Assessment Indicators                                                                                                                  |
|---------------------------------------------------|------------------------------------|----------------------------------------------------------------------------------------------------------------------------------------|
| Anthropogenic Load                                | Population                         | Population density, people/km <sup>2</sup> ; settlements by population                                                                 |
|                                                   | Mining Industry                    | Volume of rock mass production from the beginning of field development to 2000, million m <sup>3</sup> ; environmental hazard of waste |
|                                                   | Forestry                           | Volume of timber harvesting, thousand m <sup>3</sup> / year                                                                            |
|                                                   | Agriculture                        | Number of farm animals, livestock, sown area, ha                                                                                       |
|                                                   | Transport                          | Specific freight turnover, t-km / S ulus; passenger turnover, passenger-km / S of the ulus; number of vehicles per person              |
| Groups of Factors Determining the State of the ES | Assessment Objects                 | Indicative indicators of assessment                                                                                                    |
| Environmental and Social Consequences             | Air Pollution                      | Emissions, t/year                                                                                                                      |
|                                                   | Surface Water Pollution            | Discharges, t/year                                                                                                                     |
|                                                   | Disturbance of the Earth's Surface | Disturbed land, ha/km <sup>2</sup> of territory                                                                                        |
|                                                   | Medical and Demographic Situation  | Fertility per 1000 people                                                                                                              |
|                                                   |                                    | Total mortality per 1000 people                                                                                                        |
|                                                   |                                    | Infant mortality rate per 1000 people                                                                                                  |
|                                                   |                                    | General morbidity per 1000 people                                                                                                      |
|                                                   |                                    | Primary access to disability per 10,000 people                                                                                         |
|                                                   | Environmentally Caused Diseases    | Malignant tumors and neoplasms, cases per 100,000 people                                                                               |
| Stability of Natural Complexes                    | Climatic Factors                   | Average annual air temperature, °C                                                                                                     |
|                                                   |                                    | Sum of temperatures above 5°C                                                                                                          |
|                                                   |                                    | Long-term average precipitation, mm                                                                                                    |
|                                                   | Biotic Factors                     | Average timber stock, m <sup>3</sup> /ha                                                                                               |
|                                                   |                                    | Species diversity of mammals, number                                                                                                   |
|                                                   |                                    | Rare species of mammals, number                                                                                                        |
|                                                   | Lithogenic Factors                 | Depth of seasonal thawing of soils, m                                                                                                  |
|                                                   |                                    | Ice content of permafrost, points                                                                                                      |

Usually, the characteristics of natural complexes in accordance with the tasks set by the researcher are given in natural boundaries. The territorial organization of the state is based on the system of administrative division and its subsystems at different levels. Since the state of the environment is primarily associated with indicators characterizing the socio-economic aspects of environmental management, we have taken the administrative district as the lowest unit of the object of a comprehensive environmental and economic assessment of the state of the environment. The processing includes only those indicators that are available for all administrative regions. At the same time, it should be emphasized that the lack of objective statistical as well as scientific information on individual regions complicates the introduction of

indicators into the system for a comprehensive assessment of the state of the environment.

## 2. Examples of calculating the assessment of the state of the environment with the use of SRI.

### 2.1. Population. Settlements

The population density and the number of settlements are taken as indicators characterizing the burden of the population on the environment. The distribution of the population in the administrative districts is uneven: the density ranges from 0.01 in the Oleneksky district to 2.8 people per 1 km<sup>2</sup> in Megino-Kangalassky. In total, there are 75 cities and workers' settlements in the republic, 61 rural settlements (Table 2.1.1).

**Table 2.1.1 Population load on environment**

| Regions (districts) | density              |      | Number of settlements, scores |       |       |      | SRI (mean) | Ranking scale   | Level    |
|---------------------|----------------------|------|-------------------------------|-------|-------|------|------------|-----------------|----------|
|                     | on 1 km <sup>2</sup> | SRI  | Urban                         | Rural | total | SRI  |            |                 |          |
| Eveno-Bytantaysky   | 0,05                 | 0,02 | 0                             | 4     | 4     | 0,18 | 0,10       | 1<br>(<0,3)     | Very low |
| Anabar              | 0,07                 | 0,03 | 0                             | 4     | 4     | 0,18 | 0,10       |                 |          |
| Oleneksky           | 0,01                 | 0,01 | 0                             | 4     | 4     | 0,22 | 0,11       |                 |          |
| Zhigansky           | 0,04                 | 0,02 | 0                             | 5     | 5     | 0,26 | 0,14       |                 |          |
| Allaikhovskiy       | 0,04                 | 0,02 | 1                             | 6     | 7     | 0,35 | 0,19       |                 |          |
| Momsky              | 0,05                 | 0,02 | 0                             | 7     | 7     | 0,35 | 0,19       |                 |          |
| Abyisky             | 0,08                 | 0,04 | 1                             | 6     | 7     | 0,35 | 0,19       |                 |          |
| Verkhnekolymsky     | 0,12                 | 0,05 | 1                             | 5     | 6     | 0,35 | 0,20       |                 |          |
| Bulunsky            | 0,06                 | 0,03 | 2                             | 11    | 13    | 0,66 | 0,34       | 2<br>(0,31-0,7) | Low      |
| Srednekolymsky      | 0,08                 | 0,03 | 1                             | 13    | 14    | 0,66 | 0,35       |                 |          |
| Nizhnekolymsky      | 0,12                 | 0,05 | 1                             | 12    | 13    | 0,66 | 0,36       |                 |          |
| Ust-Yansky          | 0,21                 | 0,09 | 4                             | 7     | 11    | 0,71 | 0,40       |                 |          |
| Tompsonsky          | 0,15                 | 0,06 | 2                             | 14    | 16    | 0,84 | 0,45       |                 |          |
| Mountain            | 0,24                 | 0,10 | 0                             | 17    | 17    | 0,84 | 0,47       |                 |          |
| Ust-Maisky          | 0,19                 | 0,08 | 8                             | 12    | 20    | 0,97 | 0,53       |                 |          |
| Tattinsky           | 0,91                 | 0,40 | 0                             | 15    | 15    | 0,75 | 0,57       |                 |          |
| Amginsky            | 0,58                 | 0,25 | 0                             | 20    | 20    | 0,97 | 0,61       |                 |          |
| Oymyakonsky         | 0,27                 | 0,12 | 7                             | 16    | 23    | 1,15 | 0,63       |                 |          |
| Kobyaysky           | 0,17                 | 0,07 | 1                             | 26    | 27    | 1,28 | 0,68       |                 |          |
| Neryungri           | 1,15                 | 0,50 | 7                             | 2     | 9     | 0,93 | 0,71       | 3<br>(0,71-1)   | Middle   |
| Nyurba              | 0,55                 | 0,24 | 1                             | 23    | 24    | 1,19 | 0,72       |                 |          |
| Lensky              | 0,62                 | 0,27 | 3                             | 17    | 20    | 1,19 | 0,73       |                 |          |
| Verkhoyansk         | 0,14                 | 0,06 | 4                             | 26    | 30    | 1,41 | 0,74       |                 |          |
| Mirninsky           | 0,54                 | 0,23 | 6                             | 9     | 15    | 1,28 | 0,76       |                 |          |
| Vilyuisky           | 0,51                 | 0,22 | 2                             | 25    | 27    | 1,32 | 0,77       |                 |          |
| Verkhnevilyuisky    | 0,52                 | 0,22 | 0                             | 29    | 29    | 1,37 | 0,80       |                 |          |
| Aldan               | 0,37                 | 0,16 | 10                            | 12    | 22    | 1,46 | 0,81       |                 |          |
| Namsky              | 1,64                 | 0,71 | 0                             | 24    | 24    | 1,15 | 0,93       |                 |          |
| Churapchinsky       | 1,54                 | 0,67 | 0                             | 29    | 29    | 1,37 | 1,02       |                 |          |
| Khangalassky        | 1,45                 | 0,63 | 3                             | 27    | 30    | 1,50 | 1,07       | 4<br>(1,01-7)   | High     |
| Ust-Aldansky        | 1,23                 | 0,54 | 0                             | 35    | 35    | 1,63 | 1,08       |                 |          |
| Suntarsky           | 0,46                 | 0,20 | 0                             | 46    | 46    | 2,12 | 1,16       |                 |          |
| Olekminsky          | 0,19                 | 0,08 | 3                             | 51    | 54    | 2,52 | 1,30       |                 |          |
| Megino-Kangalassky  | 2,80                 | 1,22 | 1                             | 34    | 35    | 1,68 | 1,45       |                 |          |

|                           |             |             |           |            |            |             |             |           |           |
|---------------------------|-------------|-------------|-----------|------------|------------|-------------|-------------|-----------|-----------|
| Yakutsk                   | 63,07       | 27,52       | 6         | 8          | 14         | 1,15        | 14,33       | 5<br>(>7) | Very high |
| <b>Average for RS (Y)</b> | <b>2,29</b> | <b>1,00</b> | <b>75</b> | <b>601</b> | <b>676</b> | <b>1,00</b> | <b>1,00</b> |           |           |

## 2.2. Economic load

All indicators of the economic burden on the environment are combined into three large groups: industry, agriculture, and transport. Since different sectors of the economy differ in the intensity of their impact on the environment, for their leveling, appropriate amendments were introduced by expert means - the coefficients of the impact force (KS.B). For this, two extreme stages of loads on the axis of the factor's intensity have been selected: the mining industry is taken as the maximum, and agriculture is taken as the minimum. All other sectors of the economy were ranked between them. Industry. Industry dominates in the structure of the republic's economy - 49.4% of the gross regional product (GRP). A high level of industry is observed in Neryungrinsky, Olekminsky, Lensky districts (South Yakutia) and Mirninsky district (West Yakutia) (Table 2.2.1).

**Table 2.1.1 Industrial load on environment**

| Regions (districts) | Timber industry | Mining industry | Total SRI | Load           |           |
|---------------------|-----------------|-----------------|-----------|----------------|-----------|
|                     |                 |                 |           | Ranking scale  | level     |
| Kc.B                | 2,0             | 4,0             |           |                |           |
| Bulunsky            | 0,06            | 0,005           | 0,03      | 1<br>(>0,19)   | Very low  |
| Abyisky             | 0,04            |                 | 0,04      |                |           |
| Eveno-Bytantaysky   | 0,06            |                 | 0,06      |                |           |
| Zhigansky           | 0,10            |                 | 0,10      |                |           |
| Nizhnekolymsky      | 0,10            |                 | 0,10      |                |           |
| Oleneksky           | 0,10            |                 | 0,10      |                |           |
| Allaikhovsky        | 0,19            |                 | 0,19      |                |           |
| Srednekolymsky      | 0,20            |                 | 0,20      | 2<br>(0,2-0,6) | Low       |
| Anabar              |                 | 0,21            | 0,21      |                |           |
| Momsky              | 0,21            |                 | 0,21      |                |           |
| Mountain            | 0,44            |                 | 0,44      |                |           |
| Verkhnekolymsky     | 0,28            | 0,77            | 0,52      |                |           |
| Verkhnevilyuisky    | 0,56            |                 | 0,56      |                |           |
| Nyurba              | 0,90            | 0,22            | 0,56      |                |           |
| Verkhoyansk         | 0,69            | 0,46            | 0,58      | 3<br>(0,1-2)   | Middle    |
| Tomponsky           | 0,67            | 0,55            | 0,61      |                |           |
| Tattinsky           | 1,07            | 0,17            | 0,62      |                |           |
| Churapchinsky       | 0,64            |                 | 0,64      |                |           |
| Ust-Aldansky        | 0,71            |                 | 0,71      |                |           |
| Namsky              | 0,83            |                 | 0,83      |                |           |
| Suntarsky           | 1,75            | 0,00            | 0,88      |                |           |
| Kobyaysky           | 0,58            | 1,17            | 0,88      |                |           |
| Amginsky            | 1,37            |                 | 1,37      |                |           |
| Megino-Kangalassky  | 1,77            |                 | 1,77      |                |           |
| Khangalassky        | 1,88            |                 | 1,88      | 4<br>(2,01-5)  | High      |
| Vilyuisky           | 0,61            | 3,95            | 2,28      |                |           |
| Oymyakonsky         | 0,75            | 4,09            | 2,42      |                |           |
| Yakutsk             | 4,26            | 1,23            | 2,74      |                |           |
| Ust-Maisky          | 5,37            | 1,85            | 3,61      |                |           |
| Ust-Yansky          | 0,08            | 7,36            | 3,72      | 5<br>(<5)      | Very high |
| Aldan               | 8,50            | 6,60            | 7,55      |                |           |
| Neryungrinsky       | 1,94            | 14,30           | 8,12      |                |           |
|                     | 8,82            |                 | 8,82      |                |           |

|            |       |       |       |  |  |
|------------|-------|-------|-------|--|--|
| Olekminsky | 0,23  | 25,53 | 12,88 |  |  |
| Mirninsky  | 24,20 | 3,55  | 13,87 |  |  |

Comprehensive assessment of the economic burden. Industry (especially mining) and transport have the highest load on the environment (Table 2.2.3).

**Table 2.2.3 Complex economic load**

| Regions (districts) | Industry        |                 | Agriculture | Transport | SRI (mean) | Load          |                |
|---------------------|-----------------|-----------------|-------------|-----------|------------|---------------|----------------|
|                     | Timber industry | Mining industry |             |           |            | Ranking scale | level          |
| K <sub>c.b</sub>    | 2,0             | 4,0             | 1,0         | 3,0       |            |               |                |
| Zhigansky           | 0,10            |                 | 0,22        | 0,18      | 0,17       | 1<br>(<0,4)   | Very low       |
| Oleneksky           | 0,10            |                 | 0,27        | 0,18      | 0,18       |               |                |
| Abyisky             | 0,04            |                 | 0,32        | 0,29      | 0,22       |               |                |
| Bulunsky            | 0,06            | 0,00            | 0,54        | 0,33      | 0,24       |               |                |
| Allaikhovsky        | 0,19            |                 | 0,35        | 0,21      | 0,25       |               |                |
| Eveno-Bytantaysky   | 0,06            |                 | 0,60        | 0,22      | 0,29       |               |                |
| Srednekolymsky      | 0,20            |                 | 0,54        | 0,22      | 0,32       |               |                |
| Anabar              |                 | 0,21            | 0,57        | 0,19      | 0,32       |               |                |
| Nizhnekolymsky      | 0,10            |                 | 0,62        | 0,41      | 0,38       |               |                |
| Momsky              | 0,21            |                 | 0,84        | 0,31      | 0,46       | 2<br>(0,41-1) | Middle         |
| Verkhnekolymsky     | 0,28            | 0,77            | 0,23        | 0,56      | 0,46       |               |                |
| Mountain            | 0,44            |                 | 0,62        | 0,50      | 0,52       |               |                |
| Verkhoyansk         | 0,69            | 0,46            | 0,97        | 0,60      | 0,68       |               |                |
| Verkhnevilyuisky    | 0,56            |                 | 1,17        | 0,40      | 0,71       |               |                |
| Tomponsky           | 0,67            | 0,55            | 0,93        | 0,93      | 0,77       |               |                |
| Kobyaysky           | 0,58            | 1,17            | 0,90        | 0,44      | 0,77       |               |                |
| Tattinsky           | 1,07            | 0,17            | 1,41        | 1,01      | 0,91       |               |                |
| Nyurba              | 0,90            | 0,22            | 1,85        | 0,90      | 0,97       |               |                |
| Namsky              | 0,83            |                 | 1,32        | 0,93      | 1,03       | 3<br>(1,01-2) | High           |
| Ust-Aldansky        | 0,71            |                 | 1,57        | 0,84      | 1,04       |               |                |
| Suntarsky           | 1,75            | 0,00            | 1,87        | 0,62      | 1,06       |               |                |
| Churapchinsky       | 0,64            |                 | 1,58        | 1,29      | 1,17       |               |                |
| Amginsky            | 1,37            |                 | 1,90        | 0,90      | 1,39       |               |                |
| Vilyuisky           | 0,61            | 3,95            | 1,16        | 0,76      | 1,62       |               |                |
| Khangalassky        | 1,88            |                 | 1,79        | 1,31      | 1,66       |               |                |
| Oymyakonsky         | 0,75            | 4,09            | 0,67        | 1,45      | 1,74       |               |                |
| Ust-Maisky          | 5,37            | 1,85            | 0,21        | 0,87      | 2,07       | 4<br>(2,01-4) | Very high      |
| Ust-Yansky          | 0,08            | 7,36            | 0,55        | 0,68      | 2,17       |               |                |
| Megino-Kangalassky  | 1,77            |                 | 2,33        | 3,05      | 2,38       |               |                |
| Olekminsky          | 8,82            |                 | 1,42        | 0,62      | 3,62       |               |                |
| Aldan               | 8,50            | 6,60            | 0,65        | 2,29      | 4,51       | 5<br>(>4)     | Extremely high |
| Neryungri           | 1,94            | 14,30           | 0,34        | 4,22      | 5,20       |               |                |
| Mirninsky           | 0,23            | 25,53           | 0,27        | 2,86      | 7,22       |               |                |
| Lensky              | 24,20           | 3,55            | 0,44        | 2,03      | 7,56       |               |                |
| Yakutsk             | 4,26            | 1,23            | 0,74        | 54,61     | 15,21      |               |                |

### 2.3. Technogenic violations of the natural environment

Within the territory of Yakutia, according to the level of pollution of atmospheric air, surface waters and the degree of disturbance of the earth's surface, five groups are distinguished. Table 2.3.1 presents a ranked series of analyzed indicators and their overall assessment.

**Table 2.3.1. Comprehensive assessment of violations in the natural environment**

| Regions (districts) | Discharge of contaminated wastewater into surface water bodies |             | Land violation at the end of the year |             | The amount of pollutants emitted into the atmosphere |             | Total SRI   | Violations      |           |
|---------------------|----------------------------------------------------------------|-------------|---------------------------------------|-------------|------------------------------------------------------|-------------|-------------|-----------------|-----------|
|                     | million m <sup>3</sup>                                         | SRI         | hectare                               | SRI         | tn                                                   | SRI         |             | Ranking scale   | Degree    |
| Eveno-Bytantaysky   |                                                                |             | 5,9                                   | 0,00        |                                                      |             | 0,002       | 1<br>(<0,37)    | Very Low  |
| Zhigansky           |                                                                |             | 5,2                                   | 0,00        | 42                                                   | 0,01        | 0,005       |                 |           |
| Mountain            |                                                                |             | 26,6                                  | 0,02        | 165                                                  | 0,04        | 0,02        |                 |           |
| Namsky              |                                                                |             | 8,9                                   | 0,01        | 224                                                  | 0,05        | 0,02        |                 |           |
| Oleneksky           |                                                                |             | 30,5                                  | 0,02        | 218                                                  | 0,05        | 0,02        |                 |           |
| Momsky              | 0,07                                                           | 0,01        | 160,9                                 | 0,12        | 253                                                  | 0,06        | 0,07        |                 |           |
| Tattinsky           |                                                                |             | 47,8                                  | 0,04        | 1110                                                 | 0,26        | 0,10        |                 |           |
| Ust-Aldansky        |                                                                |             | 55,8                                  | 0,04        | 1097                                                 | 0,25        | 0,10        |                 |           |
| Vilyuisky           |                                                                |             | 106,1                                 | 0,08        | 952                                                  | 0,22        | 0,10        |                 |           |
| Srednekolymsky      |                                                                |             |                                       |             | 1336                                                 | 0,31        | 0,10        |                 |           |
| Verkhnevilyuisky    | 0,03                                                           | 0,01        | 132,1                                 | 0,10        | 896                                                  | 0,21        | 0,11        |                 |           |
| Allaikhovskiy       | 0,15                                                           | 0,03        | 362,3                                 | 0,28        | 89                                                   | 0,02        | 0,11        |                 |           |
| Megino-Kangalassky  |                                                                |             | 97,5                                  | 0,08        | 1177                                                 | 0,27        | 0,12        |                 |           |
| Amginsky            |                                                                |             | 217,0                                 | 0,17        | 1062                                                 | 0,25        | 0,14        |                 |           |
| Suntarsky           |                                                                |             | 380,5                                 | 0,29        | 675                                                  | 0,16        | 0,15        |                 |           |
| Abyisky             | 0,10                                                           | 0,02        | 369,9                                 | 0,29        | 1175                                                 | 0,27        | 0,19        |                 |           |
| Churapchinsky       |                                                                |             | 35,8                                  | 0,03        | 2487                                                 | 0,58        | 0,20        |                 |           |
| Kobyaysky           | 0,04                                                           | 0,01        | 163,9                                 | 0,13        | 2280                                                 | 0,53        | 0,22        |                 |           |
| Nyurba              | 0,53                                                           | 0,12        | 186,3                                 | 0,14        | 2085                                                 | 0,48        | 0,25        |                 |           |
| Bulunsky            | 1,57                                                           | 0,35        | 283,5                                 | 0,22        | 1106                                                 | 0,26        | 0,27        |                 |           |
| Anabar              | 2,81                                                           | 0,62        | 354,2                                 | 0,27        |                                                      |             | 0,30        |                 |           |
| Olekminsky          | 0,08                                                           | 0,02        | 479,4                                 | 0,37        | 2833                                                 | 0,66        | 0,35        | 2<br>(0,38-0,8) | Low       |
| Nizhnekolymsky      | 1,62                                                           | 0,36        | 6,7                                   | 0,01        | 3622                                                 | 0,84        | 0,40        |                 |           |
| Khangalassky        | 1,76                                                           | 0,39        | 305,2                                 | 0,24        | 2996                                                 | 0,70        | 0,44        |                 |           |
| Verkhnekolymsky     | 0,17                                                           | 0,04        | 334,5                                 | 0,26        | 4438                                                 | 1,03        | 0,44        |                 |           |
| Lensky              | 1,80                                                           | 0,40        | 878,0                                 | 0,68        | 3030                                                 | 0,70        | 0,59        |                 |           |
| Verkhoyansk         | 0,52                                                           | 0,11        | 507,4                                 | 0,39        | 7322                                                 | 1,70        | 0,74        | 3<br>(0,81-1,3) | Middle    |
| Tomponsky           | 1,21                                                           | 0,27        | 514,8                                 | 0,40        | 8266                                                 | 1,92        | 0,86        |                 |           |
| Oymyakonsky         | 2,04                                                           | 0,45        | 2080,5                                | 1,60        | 7276                                                 | 1,69        | 1,25        | 4<br>(1,31-3,7) | High      |
| Ust-Maisky          | 1,15                                                           | 0,25        | 3134,0                                | 2,42        | 7376                                                 | 1,71        | 1,46        |                 |           |
| Ust-Yansky          | 0,62                                                           | 0,14        | 4255,8                                | 3,28        | 8745                                                 | 2,03        | 1,82        |                 |           |
| Yakutsk             | 24,86                                                          | 5,52        | 241,8                                 | 0,19        | 9757                                                 | 2,27        | 2,66        | 5<br>(>3,71)    | Very high |
| Aldan               | 8,70                                                           | 1,93        | 8861,4                                | 6,83        | 21198                                                | 4,92        | 4,56        |                 |           |
| Mirninsky           | 23,91                                                          | 5,31        | 11189,6                               | 8,62        | 10759                                                | 2,50        | 5,48        |                 |           |
| Neryungri           | 25,32                                                          | 5,62        | 8295,7                                | 6,39        | 26105                                                | 6,06        | 6,03        |                 |           |
| Average for RS (Y)  | <b>4,50</b>                                                    | <b>1,00</b> | <b>1297,5</b>                         | <b>1,00</b> | <b>4308</b>                                          | <b>1,00</b> | <b>1,00</b> |                 |           |

## 2.4. Health status of the population

Human health is closely related to the state (quality) of the environment, which includes, in a broad sense, a set of abiotic, biotic and social environments. A low level of susceptibility to the population was established for four industrially developed uluses: Neryungri, Mirninsky, Ust-Maisky, Lensky, which indicates the best socio-economic living conditions of the population (Table 2.4.1).

**Table 2.4.1. Medical and demographic characteristics of the population (1990-2000)**

| Regions (districts) | Fertility |      | General mortality |      | Infant mortality |      | General morbidity |      | Primary exit to disability |      | Total SRI | Affected population |           |
|---------------------|-----------|------|-------------------|------|------------------|------|-------------------|------|----------------------------|------|-----------|---------------------|-----------|
|                     | On 1000   | SRI  | On 1000           | SRI  | On 1000          | SRI  | On 1000           | SRI  | On 1000                    | SRI  |           | Ranking scale       | Degree    |
| Neryungri           | 11,7      | 0,68 | 5,3               | 0,59 | 19,3             | 0,89 | 822,9             | 0,86 | 28,2                       | 0,55 | 0,71      | 1<br>(<0,83)        | Very Low  |
| Mirninsky           | 12,1      | 0,70 | 5,8               | 0,64 | 18,2             | 0,84 | 928,4             | 0,98 | 43,0                       | 0,83 | 0,80      |                     |           |
| Ust-Maisky          | 11,6      | 0,67 | 9,4               | 1,04 | 18,7             | 0,86 | 818,1             | 0,86 | 35,6                       | 0,69 | 0,83      |                     |           |
| Lensky              | 13,4      | 0,78 | 9,8               | 1,09 | 17,7             | 0,82 | 677,4             | 0,71 | 38,2                       | 0,74 | 0,83      |                     |           |
| Oymyakonsky         | 9,5       | 0,55 | 7,2               | 0,80 | 22,6             | 1,04 | 1032,2            | 1,08 | 36,5                       | 0,71 | 0,84      | 2<br>(0,84-0,95)    | Low       |
| Verkhnekolymsky     | 13,4      | 0,78 | 8,8               | 0,98 | 21,8             | 1,01 | 800,4             | 0,84 | 40,0                       | 0,78 | 0,88      |                     |           |
| Ust-Yansky          | 11,6      | 0,67 | 6,6               | 0,74 | 27,6             | 1,27 | 866,5             | 0,91 | 43,1                       | 0,84 | 0,89      |                     |           |
| Bulunsky            | 14,2      | 0,82 | 7,9               | 0,87 | 18,1             | 0,84 | 1108,3            | 1,16 | 37,8                       | 0,73 | 0,89      |                     |           |
| Nizhnekolymsky      | 12,7      | 0,74 | 8,0               | 0,89 | 24,4             | 1,12 | 800,6             | 0,84 | 45,7                       | 0,89 | 0,90      |                     |           |
| Aldan               | 12,3      | 0,72 | 12,2              | 1,35 | 16,2             | 0,75 | 837,8             | 0,88 | 48,6                       | 0,94 | 0,93      |                     |           |
| Tomponsky           | 14,8      | 0,86 | 8,2               | 0,91 | 19,7             | 0,91 | 837,9             | 0,88 | 58,4                       | 1,13 | 0,94      | 3<br>(0,96-1,05)    | Middle    |
| Yakutsk             | 14,2      | 0,82 | 10,5              | 1,16 | 18,3             | 0,84 | 915,6             | 0,96 | 52,5                       | 1,02 | 0,96      |                     |           |
| Verkhoyansk         | 17,2      | 1,00 | 9,1               | 1,01 | 24,7             | 1,14 | 667,5             | 0,70 | 51,5                       | 1,00 | 0,97      |                     |           |
| Allaikhovsky        | 15,5      | 0,90 | 9,1               | 1,01 | 16,0             | 0,74 | 1140,4            | 1,20 | 53,9                       | 1,05 | 0,98      |                     |           |
| Vilyuysky           | 18,6      | 1,08 | 8,4               | 0,93 | 19,0             | 0,88 | 1045,3            | 1,10 | 53,4                       | 1,04 | 1,00      |                     |           |
| Amginsky            | 21,7      | 1,26 | 8,1               | 0,89 | 19,0             | 0,88 | 1027,0            | 1,08 | 48,2                       | 0,93 | 1,01      |                     |           |
| Churapchinsky       | 22,2      | 1,29 | 8,9               | 0,99 | 21,2             | 0,98 | 807,9             | 0,85 | 49,4                       | 0,96 | 1,01      |                     |           |
| Zhigansky           | 16,8      | 0,98 | 9,6               | 1,06 | 23,0             | 1,06 | 1017,0            | 1,07 | 50,8                       | 0,99 | 1,03      |                     |           |
| Abyisky             | 17,4      | 1,01 | 9,8               | 1,09 | 20,4             | 0,94 | 1139,5            | 1,20 | 48,8                       | 0,95 | 1,04      |                     |           |
| Khangalassky        | 15,3      | 0,89 | 9,8               | 1,08 | 20,2             | 0,93 | 1050,9            | 1,10 | 60,9                       | 1,18 | 1,04      |                     |           |
| Kobyaysky           | 18,1      | 1,05 | 9,6               | 1,07 | 20,0             | 0,92 | 1072,3            | 1,13 | 53,1                       | 1,03 | 1,04      |                     |           |
| Srednekolymsky      | 18,3      | 1,06 | 8,5               | 0,94 | 19,5             | 0,90 | 1046,5            | 1,10 | 61,8                       | 1,20 | 1,04      |                     |           |
| Megino-Kangalassky  | 19,5      | 1,13 | 9,3               | 1,03 | 22,6             | 1,04 | 903,3             | 0,95 | 56,4                       | 1,09 | 1,05      | 4<br>(1,06-1,15)    | High      |
| Ust-Aldansky        | 19,9      | 1,16 | 10,4              | 1,15 | 22,3             | 1,03 | 732,9             | 0,77 | 60,5                       | 1,17 | 1,06      |                     |           |
| Tattinsky           | 22,6      | 1,31 | 8,0               | 0,89 | 18,0             | 0,83 | 1009,9            | 1,06 | 61,8                       | 1,20 | 1,06      |                     |           |
| Suntarsky           | 21,0      | 1,22 | 8,9               | 0,99 | 24,0             | 1,11 | 965,8             | 1,01 | 51,9                       | 1,01 | 1,07      |                     |           |
| Nyurba              | 19,6      | 1,14 | 8,9               | 0,99 | 21,4             | 0,99 | 1017,6            | 1,07 | 60,1                       | 1,17 | 1,07      |                     |           |
| Momsky              | 20,0      | 1,16 | 10,2              | 1,14 | 22,3             | 1,03 | 1084,1            | 1,14 | 53,0                       | 1,03 | 1,10      |                     |           |
| Namsky              | 21,5      | 1,25 | 10,1              | 1,12 | 17,8             | 0,82 | 1141,6            | 1,20 | 58,5                       | 1,14 | 1,10      |                     |           |
| Olekminsky          | 16,8      | 0,98 | 11,2              | 1,24 | 24,9             | 1,15 | 753,8             | 0,79 | 71,8                       | 1,39 | 1,11      |                     |           |
| Mountain            | 21,8      | 1,26 | 8,1               | 0,90 | 19,0             | 0,88 | 1145,0            | 1,20 | 68,7                       | 1,33 | 1,12      |                     |           |
| Verkhnevilyuysky    | 23,5      | 1,36 | 9,2               | 1,02 | 21,9             | 1,01 | 1168,0            | 1,23 | 52,8                       | 1,02 | 1,13      |                     |           |
| Anabar              | 22,0      | 1,28 | 9,2               | 1,02 | 33,9             | 1,56 | 1054,5            | 1,11 | 46,6                       | 0,91 | 1,17      | 5<br>(>1,15)        | Very High |
| Oleneksky           | 22,6      | 1,31 | 10,2              | 1,13 | 26,8             | 1,24 | 937,5             | 0,98 | 67,1                       | 1,30 | 1,19      |                     |           |
| Eveno-Bytantaysky   | 19,9      | 1,16 | 11,2              | 1,24 | 38,4             | 1,77 | 940,3             | 0,99 | 54,1                       | 1,05 | 1,24      |                     |           |



The prevalence of cancer diseases increases depending on the transition of the economy of the districts from agricultural to industrial specialization. Low and low levels of susceptibility are characteristic mainly for agricultural areas (Anabarsky, Eveno-Bytantaysky, Amginsky, etc.), high and high - for industrial (Yakutsk, Neryungrinsky, Aldansky, Mirninsky Lensky, etc.) (Table 2.4.2).

**Table 2.4.2 Prevalence of malignant neoplasms (1990-2000)**

| Regions (districts) | Soreness of malignant neoplasms |      | Affection       |           |
|---------------------|---------------------------------|------|-----------------|-----------|
|                     | on 100000                       | SRI  | Ranking scale   | Degree    |
| Anabar              | 182,7                           | 0,49 | 1<br>(>0,7)     | Very low  |
| Eveno-Bytantaysky   | 248,6                           | 0,66 |                 |           |
| Oleneksky           | 265,2                           | 0,71 |                 |           |
| Ust-Yansky          | 271,8                           | 0,73 | 2<br>(0,71-0,9) | Low       |
| Namsky              | 278,7                           | 0,74 |                 |           |
| Abyisky             | 298,4                           | 0,80 |                 |           |
| Zhigansky           | 299,0                           | 0,80 |                 |           |
| Tattinsky           | 299,0                           | 0,80 |                 |           |
| Amginsky            | 305,6                           | 0,82 |                 |           |
| Suntarsky           | 310,0                           | 0,83 |                 |           |
| Vilyuisky           | 315,5                           | 0,84 |                 |           |
| Nyurba              | 316,4                           | 0,84 |                 |           |
| Verkhnevilyuisky    | 321,9                           | 0,86 |                 |           |
| Churapchinsky       | 323,7                           | 0,86 |                 |           |
| Mountain            | 329,0                           | 0,88 |                 |           |
| Ust-Aldansky        | 335,3                           | 0,89 |                 |           |
| Oymyakonsky         | 340,4                           | 0,91 | 3<br>(0,91-1)   | Middle    |
| Ust-Maisky          | 343,5                           | 0,92 |                 |           |
| Bulunsky            | 343,6                           | 0,92 |                 |           |
| Verkhoyansk         | 347,6                           | 0,93 |                 |           |
| Kobyaysky           | 376,0                           | 1,00 |                 |           |
| Allaikhovsky        | 384,1                           | 1,02 |                 |           |
| Megino-Kangalassky  | 385,8                           | 1,03 |                 |           |
| Momsky              | 394,6                           | 1,05 |                 |           |
| Srednekolymsky      | 408,1                           | 1,09 |                 |           |
| Khangalassky        | 424,2                           | 1,13 | 4<br>(1,1-1,6)  | High      |
| Verkhnekolymsky     | 424,7                           | 1,13 |                 |           |
| Nizhnekolymsky      | 429,7                           | 1,15 |                 |           |
| Tomponsky           | 445,0                           | 1,19 |                 |           |
| Neryungri           | 469,9                           | 1,25 |                 |           |
| Aldan               | 494,0                           | 1,32 |                 |           |
| Mirninsky           | 499,8                           | 1,33 |                 |           |
| Olekminsky          | 508,1                           | 1,36 |                 |           |
| Lensky              | 612,7                           | 1,63 | 5<br>(<1,6)     | Very high |
| Yakutsk             | 786,0                           | 2,10 |                 |           |

Table 2.4.3 provides an assessment of the state of health of the population, taking into account the indicators of malignant diseases. The first three levels (low, low, medium) are mainly typical for agricultural areas, the last two (high and high) - mainly

for industrial and urban administrative areas. Yakutsk occupies the last place in the ranking.

**Table 2.4.3 Assessment of the health status of the population**

| Regions (districts) | Medical and demographic indicators | Malignant neoplasms | Total SRI | Affection        |           |
|---------------------|------------------------------------|---------------------|-----------|------------------|-----------|
|                     |                                    |                     |           | Ranking scale    | Degree    |
| Ust-Yansky          | 0,89                               | 0,73                | 0,81      | 1<br>(>0,88)     | Very low  |
| Anabar              | 1,17                               | 0,49                | 0,83      |                  |           |
| Ust-Maisky          | 0,83                               | 0,92                | 0,87      |                  |           |
| Oymyakonsky         | 0,84                               | 0,91                | 0,87      |                  |           |
| Bulunsky            | 0,89                               | 0,92                | 0,90      | 2<br>(0,89-0,95) | Low       |
| Amginsky            | 1,01                               | 0,82                | 0,91      |                  |           |
| Zhigansky           | 1,03                               | 0,80                | 0,91      |                  |           |
| Abyisky             | 1,04                               | 0,80                | 0,92      |                  |           |
| Vilyuisky           | 1,00                               | 0,84                | 0,92      |                  |           |
| Namsky              | 1,10                               | 0,74                | 0,92      |                  |           |
| Tattinsky           | 1,06                               | 0,80                | 0,93      |                  |           |
| Churapchinsky       | 1,01                               | 0,86                | 0,94      |                  |           |
| Suntarsky           | 1,07                               | 0,83                | 0,95      |                  |           |
| Verkhoyansk         | 0,97                               | 0,93                | 0,95      |                  |           |
| Oleneksky           | 1,19                               | 0,71                | 0,95      |                  |           |
| Eveno-Bytantaysky   | 1,24                               | 0,66                | 0,95      |                  |           |
| Nyurba              | 1,07                               | 0,84                | 0,96      |                  |           |
| Ust-Aldansky        | 1,06                               | 0,89                | 0,98      | 3<br>(0,96-1,05) | Middle    |
| Neryungri           | 0,71                               | 1,25                | 0,98      |                  |           |
| Verkhnevilyuisky    | 1,13                               | 0,86                | 0,99      |                  |           |
| Mountain            | 1,12                               | 0,88                | 1,00      |                  |           |
| Allaikhovsky        | 0,98                               | 1,02                | 1,00      |                  |           |
| Verkhnekolymsky     | 0,88                               | 1,13                | 1,00      |                  |           |
| Kobyaysky           | 1,04                               | 1,00                | 1,02      |                  |           |
| Nizhnekolymsky      | 0,90                               | 1,15                | 1,02      |                  |           |
| Megino-Kangalassky  | 1,05                               | 1,03                | 1,04      |                  |           |
| Tomponsky           | 0,94                               | 1,19                | 1,06      | 4<br>(1,06-1,3)  | High      |
| Srednekolymsky      | 1,04                               | 1,09                | 1,07      |                  |           |
| Mirninsky           | 0,80                               | 1,33                | 1,07      |                  |           |
| Momsky              | 1,10                               | 1,05                | 1,08      |                  |           |
| Khangalassky        | 1,04                               | 1,13                | 1,08      |                  |           |
| Aldan               | 0,93                               | 1,32                | 1,12      |                  |           |
| Lensky              | 0,83                               | 1,63                | 1,23      |                  |           |
| Olekminsky          | 1,11                               | 1,36                | 1,23      |                  |           |
| Yakutsk             | 0,96                               | 2,10                | 1,53      | 5<br>(<1,3)      | Very high |

Analysis of environmentally related diseases showed that there is a close relationship between the prevalence of malignant neoplasms and the level of anthropogenic impact of economic activity (mainly mining). In general, when the indicator of ecologically caused diseases is included in the overall assessment of the health status of the population (the official medical and demographic characteristics do

not take it into account), there is a clear dependence of the deterioration in the health status of the population when the specialization of the regional economy changes from agricultural to industrial, which confirms the existence of a close relationship between technogenic impact and the state of human health, and the quality of his life.

### 3.1. Assessment of the stability of natural complexes to man-made impacts

The North differs from other territories in extreme natural and climatic conditions that negatively affect wildlife and human life. As the most "indicator" climatic indicators for assessing the stability of natural systems to man-made impacts, the average long-term annual air temperatures, the sum of the average daily temperatures above 5 ° C and the average long-term precipitation are considered. Table 3.1.1 shows a ranged series of average annual air temperatures.

**Table 3.1.1 Average annual air temperature**

| Regions (districts) | Air t, °C | SRI  | Ranging scale    | Level               |
|---------------------|-----------|------|------------------|---------------------|
| Lensky              | -6,0      | 0,53 | 1<br>(<0,7)      | Relatively moderate |
| Aldan               | -7,3      | 0,66 |                  |                     |
| Olekminsky          | -7,8      | 0,70 |                  |                     |
| Suntarsky           | -7,8      | 0,70 |                  |                     |
| Momsky              | -8,4      | 0,75 | 2<br>3(0,71-0,9) | Relatively extreme  |
| Neryungri           | -8,6      | 0,77 |                  |                     |
| Mirinsky            | -8,7      | 0,78 |                  |                     |
| Nyurba              | -8,8      | 0,79 |                  |                     |
| Vilyuisky           | -9,3      | 0,84 |                  |                     |
| Khangelassky        | -9,4      | 0,84 |                  |                     |
| Verkhnevilyuisky    | -9,8      | 0,88 |                  |                     |
| Ust-Maisky          | -10,0     | 0,90 |                  |                     |
| Yakutsk             | -10,3     | 0,92 |                  |                     |
| Megino-Kangalassky  | -10,3     | 0,93 |                  |                     |
| Namsky              | -10,3     | 0,93 | 3<br>(0,91-1,1)  | Extreme             |
| Kobyaysky           | -10,4     | 0,93 |                  |                     |
| Amginsky            | -11,1     | 1,00 |                  |                     |
| Mountain            | -11,1     | 1,00 |                  |                     |
| Ust-Aldansky        | -11,6     | 1,04 |                  |                     |
| Tomponsky           | -11,7     | 1,05 |                  |                     |
| Churapchinsky       | -11,7     | 1,05 |                  |                     |
| Verkhnekolymsky     | -11,8     | 1,06 |                  |                     |
| Zhigansky           | -12,0     | 1,08 |                  |                     |
| Tattinsky           | -12,2     | 1,10 |                  |                     |
| Srednekolymsky      | -12,5     | 1,12 | 4<br>(1,11-1,26) | Very extreme        |
| Oleneksky           | -12,6     | 1,13 |                  |                     |
| Bulunsky            | -13,4     | 1,21 |                  |                     |
| Abyisky             | -13,6     | 1,22 |                  |                     |
| Nizhnekolymsky      | -13,8     | 1,24 |                  |                     |
| Anabar              | -14,0     | 1,26 |                  |                     |
| Verkhoyansk         | -14,1     | 1,26 |                  |                     |
| Allaikhovsky        | -14,4     | 1,29 |                  |                     |
| Ust-Yansky          | -14,5     | 1,30 | 5<br>(>1,26)     | Absolutely extreme  |
| Eveno-Bytantaysky   | -14,9     | 1,34 |                  |                     |
| Oymyakonsky         | -15,5     | 1,39 |                  |                     |
| Average for RS (Y)  | -11,1     | 1,00 |                  |                     |

The average timber stock per 1 hectare of forested area according to the data of the Forestry Department of the Republic of Sakha (Yakutia) was taken as an indicator of forest productivity. Table 3.1.2. presents a ranked series for the vulnerability of territories depending on the productivity of the forest.

**Table 3.1.2. Vulnerability of territories depending on forest productivity**

| Regions (districts) | Stock,<br>m3 / ha | SRI  | Vulnerability   |                 |
|---------------------|-------------------|------|-----------------|-----------------|
|                     |                   |      | Ranging scale   | Level           |
| Lensky              | 137,71            | 0,02 | 1<br>(<0,5)     | Relatively low  |
| Amginsky            | 114,66            | 0,05 |                 |                 |
| Olekminsky          | 107,07            | 0,08 |                 |                 |
| Khangalassky        | 105,68            | 0,22 |                 |                 |
| Megino-Kangalassky  | 100,01            | 0,27 |                 |                 |
| Ust-Aldansky        | 103,89            | 0,27 |                 |                 |
| Churapchinsky       | 98,58             | 0,27 |                 |                 |
| Namsky              | 94,31             | 0,34 |                 |                 |
| Aldan               | 93,81             | 0,42 | 2<br>(0,51-1)   | middle          |
| Suntarsky           | 93,28             | 0,54 |                 |                 |
| Tattinsky           | 78,98             | 0,56 |                 |                 |
| Ust-Maisky          | 88,65             | 0,56 |                 |                 |
| Mountain            | 72,47             | 0,58 |                 |                 |
| Neryungri           | 68,53             | 0,58 |                 |                 |
| Yakut               | 64,32             | 0,63 |                 |                 |
| Tomponsky           | 47,06             | 0,67 |                 |                 |
| Mirninsky           | 43,27             | 0,69 |                 |                 |
| Verkhnevilyuisky    | 39,55             | 0,72 |                 |                 |
| Kobyaysky           | 38,08             | 0,79 |                 |                 |
| Nyurba              | 36,71             | 0,86 |                 |                 |
| Vilyuisky           | 34,43             | 1,17 | 3<br>(1,01-1,5) | Relatively high |
| Momsky              | 31,80             | 1,25 |                 |                 |
| Oymyakonsky         | 31,80             | 1,32 |                 |                 |
| Zhigansky           | 30,77             | 1,44 |                 |                 |
| Oleneksky           | 30,77             | 1,61 | 4<br>(1,51-2)   | high            |
| Verkhoyansk         | 29,89             | 1,70 |                 |                 |
| Eveno-Bytantaysky   | 23,28             | 1,71 |                 |                 |
| Bulunsky            | 18,46             | 1,72 |                 |                 |
| Srednekolymsky      | 15,02             | 1,79 |                 |                 |
| Abyisky             | 14,92             | 1,82 |                 |                 |
| Verkhnekolymsky     | 14,92             | 1,89 |                 |                 |
| Ust-Yansky          | 11,95             | 1,92 |                 |                 |
| Anabar              | 4,62              | 1,95 |                 |                 |
| Allaikhovsky        | 2,98              | 2,09 |                 |                 |
| Nizhnekolymsky      | 1,20              | 2,51 | 5<br>(>2)       | Very high       |
| Average for RS (Y)  | 54,96             | 1,00 |                 |                 |

### 3.2. Lithogenic factors

Employees of the Permafrost Institute of the Siberian Branch of the Russian Academy of Sciences have identified 8 zones of seasonal thawing within Yakutia (Fedorov et al., 1989). The greatest thawing depth from 3.9 to 5 m is typical mainly for the southern, south-western and some regions of Central Yakutia, the smallest (below 2 m) - for the Arctic regions (Table 3.2.1).

**Table 3.2.1 Long-term maximum depth of seasonal thawing \***

| Regions (districts) | Zones and subzones * | Long-term maximum thawing | SRI         | Seasonal thawing |              |
|---------------------|----------------------|---------------------------|-------------|------------------|--------------|
|                     |                      |                           |             | Scale ranking    | Depth        |
| Lensky              | 7 (8)                | 5,00                      | 0,59        | 1<br>(<0,75)     | The greatest |
| Megino-Kangalassky  | 6 (5)                | 4,20                      | 0,70        |                  |              |
| Olekminsky          | 6 (7)                | 4,20                      | 0,70        |                  |              |
| Aldan               | 6 (5a)               | 4,00                      | 0,74        |                  |              |
| Amginsky            | 6 (5)                | 4,00                      | 0,74        |                  |              |
| Neryungri           | 5a                   | 4,00                      | 0,74        |                  |              |
| Khangalassky        | 6 (5)                | 3,90                      | 0,75        |                  |              |
| Yakutsk             | 6 (5)                | 3,90                      | 0,75        |                  |              |
| Namsky              | 5, 6                 | 3,50                      | 0,84        | 2<br>(0,76-0,97) | Above middle |
| Ust-Aldansky        | 5 (6)                | 3,40                      | 0,87        |                  |              |
| Mountain            | 5 (6)                | 3,20                      | 0,92        |                  |              |
| Suntarsky           | 5 (6, 4)             | 3,10                      | 0,95        |                  |              |
| Vilyuisky           | 5 (3, 4, 6)          | 3,00                      | 0,98        | 3<br>(0,98-1,08) | Middle       |
| Verkhnekolymsky     | 4a (4)               | 3,00                      | 0,98        |                  |              |
| Tattinsky           | 5                    | 3,00                      | 0,98        |                  |              |
| Ust-Maisky          | 5                    | 3,00                      | 0,98        |                  |              |
| Churapchinsky       | 5                    | 3,00                      | 0,98        |                  |              |
| Oymyakonsky         | 4a, (4)              | 2,90                      | 1,01        |                  |              |
| Verkhnevilyuisky    | 5 (4, 3)             | 2,80                      | 1,05        |                  |              |
| Momsky              | 4a (4)               | 2,80                      | 1,05        |                  |              |
| Mirninsky           | 3 (4, 5, 7, 6)       | 2,70                      | 1,09        | 4<br>(1,09-1,5)  | Below middle |
| Nyurba              | 4 (5, 2)             | 2,60                      | 1,13        |                  |              |
| Abyisky             | 4                    | 2,50                      | 1,18        |                  |              |
| Verkhoyansk         | 4 (3)                | 2,50                      | 1,18        |                  |              |
| Kobyaysky           | 3 (5, 6, 4)          | 2,50                      | 1,18        |                  |              |
| Srednekolymsky      | 4 (4a, 3)            | 2,50                      | 1,18        |                  |              |
| Tomponsky           | 4, 5 (3)             | 2,50                      | 1,18        |                  |              |
| Zhigansky           | 3 (4)                | 2,30                      | 1,28        |                  |              |
| Allaikhovsky        | 2 (3, 4)             | 2,00                      | 1,47        |                  |              |
| Ust-Yansky          | 2, 3, 4              | 2,00                      | 1,47        |                  |              |
| Eveno-Bytantaysky   | 3                    | 2,00                      | 1,47        |                  |              |
| Nizhnekolymsky      | 2, 3 (4)             | 1,90                      | 1,55        |                  |              |
| Bulunsky            | 2 (3)                | 1,80                      | 1,63        | 5<br>(>1,5)      | Smallest     |
| Oleneksky           | 3 (2)                | 1,80                      | 1,63        |                  |              |
| Anabar              | 2                    | 1,50                      | 1,96        |                  |              |
| Average for RS (Y)  |                      | <b>2,94</b>               | <b>1,00</b> |                  |              |

\* The ranking is based on the data of A.N. Fedorova et al. (1989); in the first column numbers of zones and subzones are given in numbers; the order of the numbers of zones corresponds to a decrease in the specific weight in terms of the occupied area; the main zones are listed first, then the rest in brackets.

The indicators of climatic, biotic, lithogenic factors, which play a major role in the stability of ecosystems, served as the basis for a comprehensive assessment of the vulnerability of permafrost landscapes by region (Table 3.2.2, Fig. 3.2.1). In general, it doubles from south to north.

The territory of middle taiga forests is more resistant to technogenic impacts. Relatively high stability is characteristic of the southern part of the republic - Lensky, Olekminsky, Aldansky uluses with an average annual air temperature of  $-7 \dots -9^{\circ}\text{C}$  and one central Yakutsk: Amginsky, where a weak surface sensitivity to lithogenic factors is noted. Uluses of Central and Western Yakutia, where the average annual air temperature is mainly  $-10^{\circ}\text{C}$ , are characterized by medium resistance. The territory of the northern and northeastern parts of the republic is more vulnerable to technogenic impacts, where the average annual air temperature reaches  $-15.5^{\circ}\text{C}$ , and the surface sensitivity to lithogenic factors is characterized as strong and relatively strong. The ranked series is completed by two Arctic ulus - Allaikovsky and Nizhnekolymsky, which are characterized by extremely high vulnerability of natural complexes to technogenic impacts (southern border up to 70 N).

**Table 3.2.2. Vulnerability of natural complexes to technogenic impacts, average score**

| Administrative region<br>(district) | Factors                        |              |                                       |                            |                   |                 |                  |                |              |                  |                   |
|-------------------------------------|--------------------------------|--------------|---------------------------------------|----------------------------|-------------------|-----------------|------------------|----------------|--------------|------------------|-------------------|
|                                     | Climatic                       |              |                                       | Biotic<br>(biodiversity)   |                   |                 | Lithogenic       |                | Total<br>SRI | Vulnerability    |                   |
|                                     | Average annual<br>temperatures | Σ t°C<br>>5° | Long-term<br>average<br>precipitation | Average<br>timber<br>stock | Mammalian         |                 | Thawing<br>depth | Ice<br>content |              | Ranking<br>scale | Level             |
|                                     |                                |              |                                       |                            | species diversity | rare<br>species |                  |                |              |                  |                   |
| 1                                   | 2                              | 3            | 4                                     | 5                          | 6                 | 7               | 8                | 9              | 10           | 11               | 12                |
| Amginsky                            | 1,00                           | 0,81         | 0,93                                  | 0,05                       | 1,10              | 0,40            | 0,68             | 0,74           | 0,71         | 1<br>(<0,8)      | Relatively<br>low |
| Lensky                              | 0,53                           | 0,46         | 0,78                                  | 0,02                       | 0,67              | 2,09            | 0,51             | 0,67           | 0,72         |                  |                   |
| Olekminsky                          | 0,70                           | 0,56         | 0,85                                  | 0,08                       | 0,62              | 1,95            | 0,61             | 0,67           | 0,76         |                  |                   |
| Aldan                               | 0,66                           | 1,16         | 0,60                                  | 0,42                       | 0,62              | 1,36            | 0,65             | 0,67           | 0,77         |                  |                   |
| Khangalassky                        | 0,84                           | 0,90         | 0,97                                  | 0,22                       | 0,76              | 1,10            | 0,68             | 0,94           | 0,80         |                  |                   |
| Suntarsky                           | 0,70                           | 0,96         | 0,78                                  | 0,54                       | 0,95              | 0,86            | 0,85             | 0,87           | 0,81         | 2<br>(0,81-0,9)  | Middle            |
| Ust-Aldansky                        | 1,04                           | 0,47         | 1,02                                  | 0,27                       | 1,24              | 0,43            | 0,85             | 1,20           | 0,82         |                  |                   |
| Kobyaysky                           | 0,93                           | 0,99         | 0,86                                  | 0,79                       | 0,81              | 0,40            | 1,09             | 0,87           | 0,84         |                  |                   |
| Yakutsk                             | 0,92                           | 0,40         | 1,26                                  | 0,63                       | 0,76              | 0,81            | 0,78             | 1,34           | 0,86         |                  |                   |
| Megino-Kangalassky                  | 0,93                           | 0,67         | 1,29                                  | 0,27                       | 1,05              | 0,86            | 0,61             | 1,27           | 0,87         |                  |                   |
| Vilyuisky                           | 0,84                           | 0,91         | 0,87                                  | 1,17                       | 0,72              | 0,43            | 0,85             | 1,20           | 0,87         |                  |                   |
| Verkhnevilyuisky                    | 0,88                           | 1,10         | 0,90                                  | 0,72                       | 0,81              | 0,43            | 1,02             | 1,14           | 0,88         |                  |                   |
| Ust-Maisky                          | 0,90                           | 0,51         | 0,84                                  | 0,56                       | 1,38              | 1,29            | 0,95             | 0,67           | 0,89         |                  |                   |
| Churapchinsky                       | 1,05                           | 0,83         | 1,01                                  | 0,27                       | 1,24              | 0,84            | 0,95             | 1,00           | 0,90         |                  |                   |

| 1                 | 2    | 3    | 4    | 5    | 6    | 7    | 8    | 9    | 10   | 11              | 12                 |
|-------------------|------|------|------|------|------|------|------|------|------|-----------------|--------------------|
| Nyurba            | 0,79 | 1,01 | 0,87 | 0,86 | 0,86 | 0,84 | 1,02 | 1,04 | 0,91 | 3<br>(0,91-1,1) | Relatively<br>high |
| Momsky            | 0,75 | 1,07 | 0,74 | 1,25 | 1,34 | 0,47 | 1,02 | 0,80 | 0,93 |                 |                    |
| Namsky            | 0,93 | 0,81 | 1,55 | 0,34 | 0,86 | 0,81 | 0,85 | 1,34 | 0,94 |                 |                    |
| Mirninsky         | 0,78 | 1,14 | 0,74 | 0,69 | 1,24 | 1,26 | 1,02 | 0,67 | 0,94 |                 |                    |
| Mountain          | 1,00 | 1,14 | 0,95 | 0,58 | 1,10 | 0,86 | 0,85 | 1,27 | 0,97 |                 |                    |
| Tattinsky         | 1,10 | 0,97 | 1,01 | 0,56 | 1,15 | 0,92 | 0,92 | 1,14 | 0,97 |                 |                    |
| Neryungri         | 0,77 | 1,18 | 0,54 | 0,58 | 0,67 | 2,61 | 0,68 | 0,74 | 0,97 |                 |                    |
| Tomponsky         | 1,05 | 1,07 | 0,78 | 0,67 | 1,77 | 0,56 | 1,19 | 0,74 | 0,98 |                 |                    |
| Verkhnekolymsky   | 1,06 | 1,18 | 0,79 | 1,89 | 1,17 | 0,52 | 0,88 | 1,00 | 1,06 |                 |                    |
| Srednekolymsky    | 1,12 | 1,22 | 0,96 | 1,79 | 0,91 | 0,49 | 1,16 | 1,07 | 1,09 |                 |                    |
| Bulunsky          | 1,21 | 1,28 | 0,86 | 1,72 | 0,76 | 0,59 | 1,43 | 1,10 | 1,12 | 4<br>(1,11-1,2) | High               |
| Zhigansky         | 1,08 | 1,21 | 0,82 | 1,44 | 1,10 | 1,01 | 1,33 | 1,07 | 1,13 |                 |                    |
| Oymyakonsky       | 1,39 | 1,19 | 1,11 | 1,32 | 1,43 | 0,98 | 0,99 | 0,67 | 1,13 |                 |                    |
| Abyisky           | 1,22 | 1,22 | 1,00 | 1,82 | 1,15 | 0,52 | 1,02 | 1,14 | 1,13 |                 |                    |
| Oleneksky         | 1,13 | 1,22 | 0,86 | 1,61 | 0,91 | 1,40 | 1,43 | 0,77 | 1,17 |                 |                    |
| Verkhoyansk       | 1,26 | 1,19 | 1,80 | 1,70 | 0,72 | 0,92 | 1,05 | 0,74 | 1,17 |                 |                    |
| Ust-Yansky        | 1,30 | 1,24 | 1,11 | 1,92 | 1,00 | 0,67 | 1,36 | 1,40 | 1,25 | 5<br>(1,21-1,5) | Very high          |
| Eveno-Bytantaysky | 1,34 | 1,22 | 2,05 | 1,71 | 0,76 | 0,92 | 1,36 | 0,67 | 1,25 |                 |                    |
| Anabar            | 1,26 | 1,23 | 1,29 | 1,95 | 1,05 | 0,86 | 1,70 | 1,10 | 1,30 |                 |                    |
| Allaikhovsky      | 1,29 | 1,24 | 1,02 | 2,09 | 1,24 | 2,44 | 1,33 | 1,57 | 1,53 | 6<br>(>1,5)     | Extreme<br>high    |
| Nizhnekolymsky    | 1,24 | 1,25 | 1,21 | 2,51 | 1,10 | 2,09 | 1,36 | 1,74 | 1,56 |                 |                    |



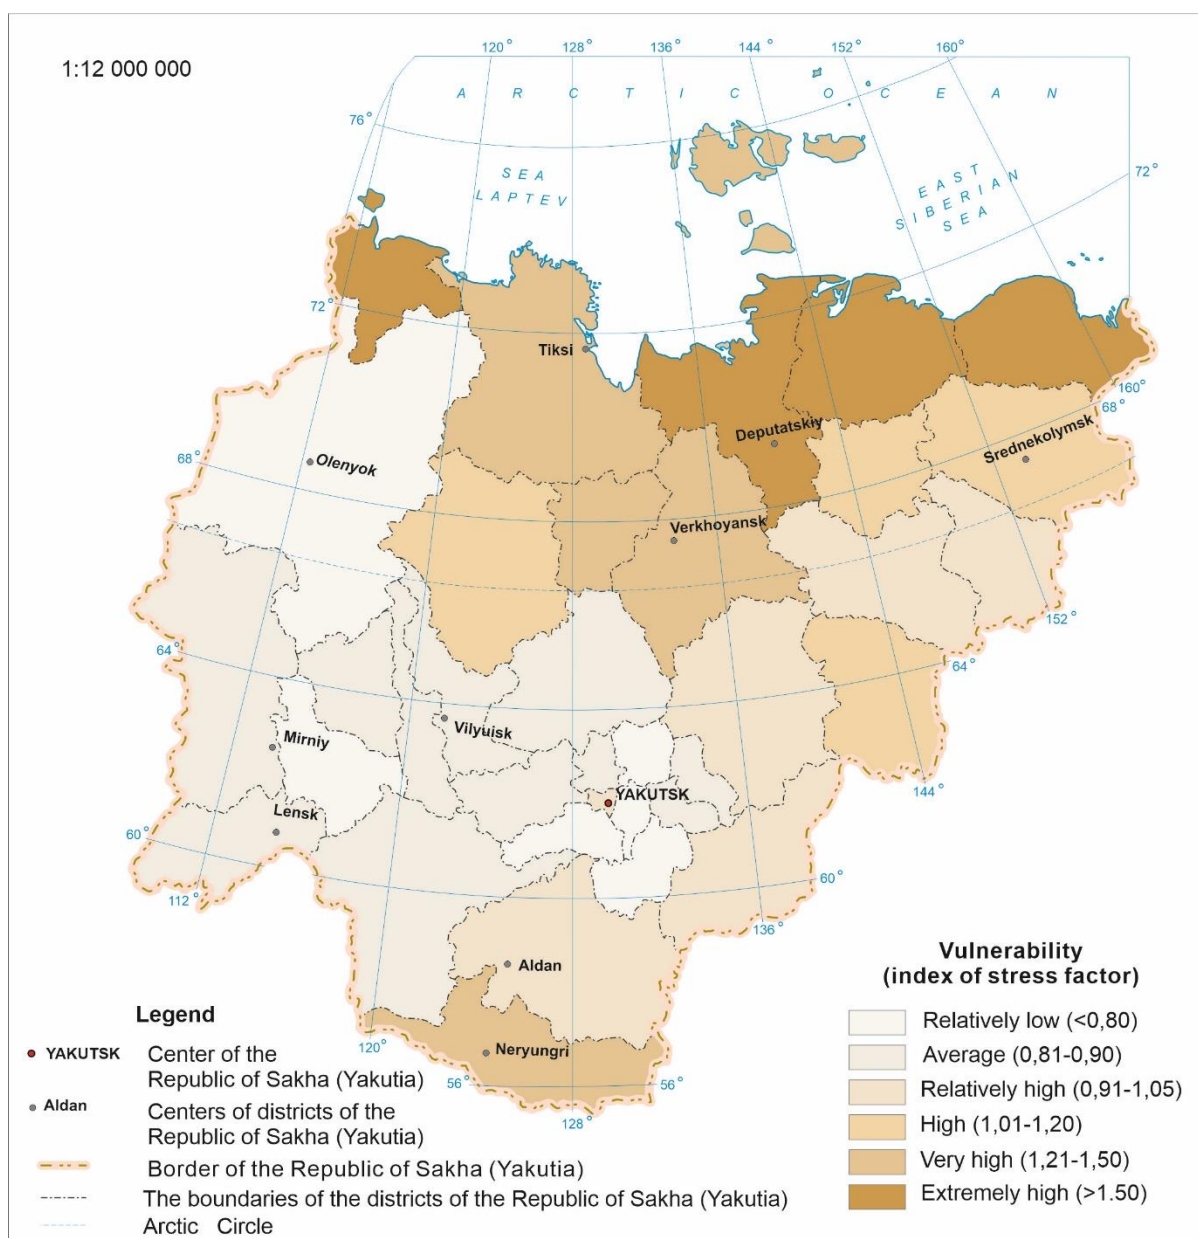

**Figure 3.2.1** Comprehensive assessment of the vulnerability of natural complexes to technogenic impacts

### 3.3. Comprehensive environmental and economic assessment state of the environment

In the "Criteria ..." (1992), the ecological situation in a particular territory is classified according to five levels of environmental conditions: 1) relatively satisfactory; 2) tense; 3) critical; 4) crisis (zone of emergency ecological situation); 5) catastrophic (zone of ecological disaster).

Table 3.3.1 and Fig. 3.3.1 presents a comprehensive ecological and economic assessment of the state of the environment. Within the territory of the republic, there are 3 categories of ecological situation (there is no crisis): favorable, satisfactory, tense. In most regions of the republic (mainly agricultural), the ecological situation is favorable and satisfactory (Fig. 3.3.1).

**Table 3.3.1 Comprehensive ecological and economic assessment of the state of the environment**

| Administrative region<br>(district) | Anthropogenic load  |                          |          |        |             |           | Environmental impact                            |                     |                         |                      |         | Vulnerability of natural complexes to<br>technogenic impacts (environmental factors) |      |      |                        |               |               |                  |                                    | SRI<br>(mean<br>) | Enviroments          |                          |
|-------------------------------------|---------------------|--------------------------|----------|--------|-------------|-----------|-------------------------------------------------|---------------------|-------------------------|----------------------|---------|--------------------------------------------------------------------------------------|------|------|------------------------|---------------|---------------|------------------|------------------------------------|-------------------|----------------------|--------------------------|
|                                     | Population          |                          | Industry |        | Agriculture | Transport | Contamination                                   |                     |                         | Health               |         | Climatic                                                                             |      |      | Biotic                 |               |               | Litogenic        |                                    |                   | Ranging<br>scale     | Status                   |
|                                     | Density on<br>1 km² | Number of<br>settlements | timber   | mining |             |           | discharge of<br>pollutants into<br>water bodies | distributed<br>land | pollutants<br>emissions | medic<br>demographic | cancers |                                                                                      |      |      | average<br>annual t °C | Σ t<br>> 5° C | precipitation | stock<br>of wood | mammalians<br>species<br>diversity |                   |                      |                          |
| 1                                   | 2                   | 3                        | 4        | 5      | 6           | 7         | 8                                               | 9                   | 10                      | 11                   | 12      | 13                                                                                   | 14   | 15   | 16                     | 17            | 18            | 19               | 20                                 | 21                | 22                   | 23                       |
| Momsky                              | 0,02                | 0,35                     | 0,21     |        | 0,84        | 0,31      | 0,01                                            | 0,12                | 0,06                    | 1,10                 | 1,05    | 0,75                                                                                 | 1,07 | 0,74 | 1,25                   | 1,34          | 0,47          | 1,02             | 0,80                               | 0,61              | 1<br>(<0,65)         | Prosperous               |
| Zhigansky                           | 0,02                | 0,26                     | 0,10     |        | 0,22        | 0,18      |                                                 | 0,00                | 0,01                    | 1,03                 | 0,80    | 1,08                                                                                 | 1,21 | 0,82 | 1,44                   | 1,10          | 1,01          | 1,33             | 1,07                               | 0,61              |                      |                          |
| Oleneksky                           | 0,01                | 0,22                     | 0,10     |        | 0,27        | 0,18      |                                                 | 0,02                | 0,05                    | 1,19                 | 0,71    | 1,13                                                                                 | 1,22 | 0,86 | 1,61                   | 0,91          | 1,40          | 1,43             | 0,77                               | 0,64              |                      |                          |
| Mountain                            | 0,10                | 0,84                     | 0,44     |        | 0,62        | 0,50      |                                                 | 0,02                | 0,04                    | 1,12                 | 0,88    | 1,00                                                                                 | 1,14 | 0,95 | 0,58                   | 1,10          | 0,86          | 0,85             | 1,27                               | 0,65              |                      |                          |
| Abyisky                             | 0,04                | 0,35                     | 0,04     |        | 0,32        | 0,29      | 0,02                                            | 0,29                | 0,27                    | 1,04                 | 0,80    | 1,22                                                                                 | 1,22 | 1,00 | 1,82                   | 1,15          | 0,52          | 1,02             | 1,14                               | 0,66              | 2<br>(0,66-0,7)      | Relatively<br>prosperous |
| Srednekolymsky                      | 0,03                | 0,66                     | 0,20     |        | 0,54        | 0,22      |                                                 |                     | 0,31                    | 1,04                 | 1,09    | 1,12                                                                                 | 1,22 | 0,96 | 1,79                   | 0,91          | 0,49          | 1,16             | 1,07                               | 0,67              |                      |                          |
| Eveno-<br>Bytantaysky               | 0,02                | 0,18                     | 0,06     |        | 0,60        | 0,22      |                                                 | 0,00                |                         | 1,24                 | 0,66    | 1,34                                                                                 | 1,22 | 2,05 | 1,71                   | 0,76          | 0,92          | 1,36             | 0,67                               | 0,68              |                      |                          |
| Verkhnevilyuisk<br>y                | 0,22                | 1,37                     | 0,56     |        | 1,17        | 0,40      | 0,01                                            | 0,10                | 0,21                    | 1,13                 | 0,86    | 0,88                                                                                 | 1,10 | 0,90 | 0,72                   | 0,81          | 0,43          | 1,02             | 1,14                               | 0,69              |                      |                          |
| Bulunsky                            | 0,03                | 0,66                     | 0,06     | 0,005  | 0,54        | 0,33      | 0,35                                            | 0,22                | 0,26                    | 0,89                 | 0,92    | 1,21                                                                                 | 1,28 | 0,86 | 1,72                   | 0,76          | 0,59          | 1,43             | 1,10                               | 0,69              |                      |                          |
| Amginsky                            | 0,25                | 0,97                     | 1,37     |        | 1,90        | 0,90      |                                                 | 0,17                | 0,25                    | 1,01                 | 0,82    | 1,00                                                                                 | 0,81 | 0,93 | 0,05                   | 1,10          | 0,40          | 0,68             | 0,74                               | 0,70              |                      |                          |
| Kobyaysky                           | 0,07                | 1,28                     | 0,58     | 1,17   | 0,90        | 0,44      | 0,01                                            | 0,13                | 0,53                    | 1,04                 | 1,00    | 0,93                                                                                 | 0,99 | 0,86 | 0,79                   | 0,81          | 0,40          | 1,09             | 0,87                               | 0,73              | 3<br>(0,71-<br>0,79) | Satisfactory             |
| Ust-Aldansky                        | 0,54                | 1,63                     | 0,71     |        | 1,57        | 0,84      |                                                 | 0,04                | 0,25                    | 1,06                 | 0,89    | 1,04                                                                                 | 0,47 | 1,02 | 0,27                   | 1,24          | 0,43          | 0,85             | 1,20                               | 0,74              |                      |                          |
| Verkhnekolymsk<br>y                 | 0,05                | 0,35                     | 0,28     | 0,77   | 0,23        | 0,56      | 0,04                                            | 0,26                | 1,03                    | 0,88                 | 1,13    | 1,06                                                                                 | 1,18 | 0,79 | 1,89                   | 1,17          | 0,52          | 0,88             | 1,00                               | 0,74              |                      |                          |
| Anabar                              | 0,03                | 0,18                     |          | 0,21   | 0,57        | 0,19      | 0,62                                            | 0,27                |                         | 1,17                 | 0,49    | 1,26                                                                                 | 1,23 | 1,29 | 1,95                   | 1,05          | 0,86          | 1,70             | 1,10                               | 0,75              |                      |                          |
| Namsky                              | 0,71                | 1,15                     | 0,83     |        | 1,32        | 0,93      |                                                 | 0,01                | 0,05                    | 1,10                 | 0,74    | 0,93                                                                                 | 0,81 | 1,55 | 0,34                   | 0,86          | 0,81          | 0,85             | 1,34                               | 0,75              |                      |                          |

|                        |       |      |       |       |      |       |      |      |      |      |      |      |      |      |      |      |      |      |      |      |               |                            |
|------------------------|-------|------|-------|-------|------|-------|------|------|------|------|------|------|------|------|------|------|------|------|------|------|---------------|----------------------------|
| Tattinsky              | 0,40  | 0,75 | 1,07  | 0,17  | 1,41 | 1,01  |      | 0,04 | 0,26 | 1,06 | 0,80 | 1,10 | 0,97 | 1,01 | 0,56 | 1,15 | 0,92 | 0,92 | 1,14 | 0,77 |               |                            |
| Churapchinsky          | 0,67  | 1,37 | 0,64  |       | 1,58 | 1,29  |      | 0,03 | 0,58 | 1,01 | 0,86 | 1,05 | 0,83 | 1,01 | 0,27 | 1,24 | 0,84 | 0,95 | 1,00 | 0,80 | 4<br>(0,8-1)  | Relatively<br>satisfactory |
| Nyurba                 | 0,24  | 1,19 | 0,90  | 0,22  | 1,85 | 0,90  | 0,12 | 0,14 | 0,48 | 1,07 | 0,84 | 0,79 | 1,01 | 0,87 | 0,86 | 0,86 | 0,84 | 1,02 | 1,04 | 0,80 |               |                            |
| Suntarsky              | 0,20  | 2,12 | 1,75  | 0,004 | 1,87 | 0,62  |      | 0,29 | 0,16 | 1,07 | 0,83 | 0,70 | 0,96 | 0,78 | 0,54 | 0,95 | 0,86 | 0,85 | 0,87 | 0,81 |               |                            |
| Allaikhovsky           | 0,02  | 0,35 | 0,19  |       | 0,35 | 0,21  | 0,03 | 0,28 | 0,02 | 0,98 | 1,02 | 1,29 | 1,24 | 1,02 | 2,09 | 1,24 | 2,44 | 1,33 | 1,57 | 0,83 |               |                            |
| Tomponsky              | 0,06  | 0,84 | 0,67  | 0,55  | 0,93 | 0,93  | 0,27 | 0,40 | 1,92 | 0,94 | 1,19 | 1,05 | 1,07 | 0,78 | 0,67 | 1,77 | 0,56 | 1,19 | 0,74 | 0,87 |               |                            |
| Khangalassky           | 0,63  | 1,50 | 1,88  |       | 1,79 | 1,31  | 0,39 | 0,24 | 0,70 | 1,04 | 1,13 | 0,84 | 0,90 | 0,97 | 0,22 | 0,76 | 1,10 | 0,68 | 0,94 | 0,90 |               |                            |
| Vilyuisky              | 0,22  | 1,32 | 0,61  | 3,95  | 1,16 | 0,76  |      | 0,08 | 0,22 | 1,00 | 0,84 | 0,84 | 0,91 | 0,87 | 1,17 | 0,72 | 0,43 | 0,85 | 1,20 | 0,90 |               |                            |
| Nizhnekolymsky         | 0,05  | 0,66 | 0,10  |       | 0,62 | 0,41  | 0,36 | 0,01 | 0,84 | 0,90 | 1,15 | 1,24 | 1,25 | 1,21 | 2,51 | 1,10 | 2,09 | 1,36 | 1,74 | 0,93 |               |                            |
| Verkhoyansk            | 0,06  | 1,41 | 0,69  | 0,46  | 0,97 | 0,60  | 0,11 | 0,39 | 1,70 | 0,97 | 0,93 | 1,26 | 1,19 | 1,80 | 1,70 | 0,72 | 0,92 | 1,05 | 0,74 | 0,93 |               |                            |
| Megino-<br>Kangalassky | 1,22  | 1,68 | 1,77  |       | 2,33 | 3,05  |      | 0,08 | 0,27 | 1,05 | 1,03 | 0,93 | 0,67 | 1,29 | 0,27 | 1,05 | 0,86 | 0,61 | 1,27 | 1,02 | 5<br>(1,01-2) | Relatively<br>tense        |
| Ust-Maisky             | 0,08  | 0,97 | 5,37  | 1,85  | 0,21 | 0,87  | 0,25 | 2,42 | 1,71 | 0,83 | 0,92 | 0,90 | 0,51 | 0,84 | 0,56 | 1,38 | 1,29 | 0,95 | 0,67 | 1,19 |               |                            |
| Oymyakonsky            | 0,12  | 1,15 | 0,75  | 4,09  | 0,67 | 1,45  | 0,45 | 1,60 | 1,69 | 0,84 | 0,91 | 1,39 | 1,19 | 1,11 | 1,32 | 1,43 | 0,98 | 0,99 | 0,67 | 1,20 |               |                            |
| Olekminsky             | 0,08  | 2,52 | 8,82  |       | 1,42 | 0,62  | 0,02 | 0,37 | 0,66 | 1,11 | 1,36 | 0,70 | 0,56 | 0,85 | 0,08 | 0,62 | 1,95 | 0,61 | 0,67 | 1,21 |               |                            |
| Ust-Yansky             | 0,09  | 0,71 | 0,08  | 7,36  | 0,55 | 0,68  | 0,14 | 3,28 | 2,03 | 0,89 | 0,73 | 1,30 | 1,24 | 1,11 | 1,92 | 1,00 | 0,67 | 1,36 | 1,40 | 1,40 |               |                            |
| Lensky                 | 0,27  | 1,19 | 24,20 | 3,55  | 0,44 | 2,03  | 0,40 | 0,68 | 0,70 | 0,83 | 1,63 | 0,53 | 0,46 | 0,78 | 0,02 | 0,67 | 2,09 | 0,51 | 0,67 | 2,19 | 6<br>(2-3)    | Tense                      |
| Aldan                  | 0,16  | 1,46 | 8,50  | 6,60  | 0,65 | 2,29  | 1,93 | 6,83 | 4,92 | 0,93 | 1,32 | 0,66 | 1,16 | 0,60 | 0,42 | 0,62 | 1,36 | 0,65 | 0,67 | 2,20 |               |                            |
| Neryungri              | 0,50  | 0,93 | 1,94  | 14,30 | 0,34 | 4,22  | 5,62 | 6,39 | 6,06 | 0,71 | 1,25 | 0,77 | 1,18 | 0,54 | 0,58 | 0,67 | 2,61 | 0,68 | 0,74 | 2,63 |               |                            |
| Mirninsky              | 0,23  | 1,28 | 0,23  | 25,53 | 0,27 | 2,86  | 5,31 | 8,62 | 2,50 | 0,80 | 1,33 | 0,78 | 1,14 | 0,74 | 0,69 | 1,24 | 1,26 | 1,02 | 0,67 | 2,97 |               |                            |
| Yakutsk                | 27,52 | 1,15 | 4,26  | 1,23  | 0,74 | 54,61 | 5,52 | 0,19 | 2,27 | 0,96 | 2,10 | 0,92 | 0,40 | 1,26 | 0,63 | 0,76 | 0,81 | 0,78 | 1,34 | 5,65 | 7<br>(>3)     | Extremely<br>tense         |

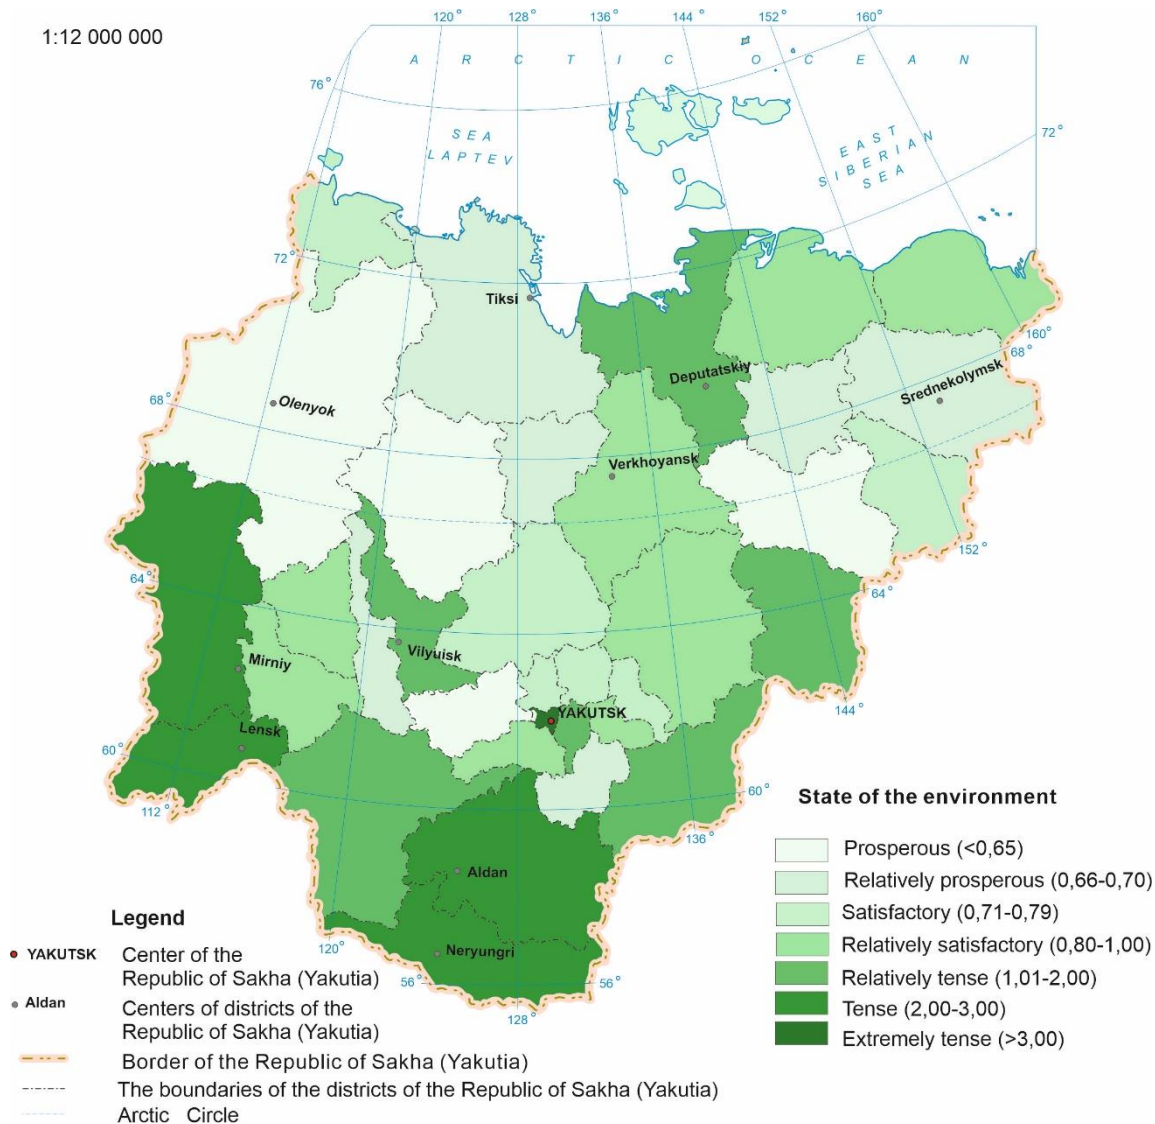

**Figure. 3.3.1.** Comprehensive ecological and economic assessment of the state of the environment of the Republic of Sakha (Yakutia)

A tense (of varying degree) category of the state of the environment is allocated in 10 regions. The regions are characterized by a relatively tense state, in the structure of the economy of which, against the background of the dominant agricultural production, the mining industry is developing to a certain extent (Ust-Maisky, Oymyakonsky, Ust-Yansky). The tense ecological situation is inherent in areas with developed industrial production (Mirninsky, Lensky, Neryungrinsky, Aldansky). An extremely tense ecological situation has developed in the city of Yakutsk with its subordinate territory.

### References

1. Burtseva E.I. Comprehensive ecological and economic assessment of the state of the environment of the Republic of Sakha (Yakutia) // Science and Education. 2005. - No. 2 (38). - S. 37-43.
2. Burtseva EI Geoecological aspects of the development of Yakutia. Novosibirsk: Nauka, 2006. -- 270 p.

3. Grave N.A. Principles for assessing the sensitivity of a surface to technogenic impacts (on the example of the territory of Yakutia) // Nature Protection of Yakutia. - Yakutsk: YaF SO AN SSSR, 1979. - S. 91-94
4. Criteria for assessing the ecological situation of territories to identify zones of an ecological emergency and zones of ecological disaster. - Ministry of Environmental Protection and Natural Resources, 1992
5. Reference book on the climate of the USSR. L: Gidrometeoizdat, 1966. - Issue. 24, h.
6. Fedorov A.N., Botulu T.A., Varlamov S.P. and other Permafrost landscapes of Yakutia: Explanatory note to the "Permafrost landscape map of the Yakut ASSR." - M.: GUGK, 1989. -- 70 p.
